# Supplementary material for: Olfactory Responses to Natal Stream Water in Sockeye Salmon by BOLD fMRI
Source: PubMed Central journal article supplement (PMC3022028; doi:10.1371/journal.pone.0016051), 2011-01-17
Supplement: pone.0016051.s001.pdf [file pone.0016051.s001.pdf]

Table S1. The concentration of amino acids in the spring water of Toya Lake Station

| <b>Amino acids</b>    | <b>Concentration (nM)</b> |
|-----------------------|---------------------------|
| o-Phosphoserine       | 8.9                       |
| Taurine               | 5.6                       |
| o-Phosphoethanolamine | 1.7                       |
| L-Aspartic acid       | 0.3                       |
| L-Threonine           | 5.2                       |
| L-Serine              | 2.3                       |
| L-Glutamic acid       | 2.0                       |
| L-Arginine            | 0.8                       |
| Glycine               | 5.0                       |
| L-Alanine             | 3.0                       |
| L-Valine              | 1.1                       |
| L-Isoleucine          | 0.8                       |
| L-Tyrosine            | 0.6                       |
| L-Phenylalanine       | 0.6                       |
| β-Alanine             | 1.5                       |
| γ-Amino butyric acid  | 0.4                       |
| L-Ornithine           | 2.2                       |
| L-Lysine              | 1.2                       |
| L-Histidine           | 0.9                       |
| L-Anserine            | 1.9                       |
| L-Cysteine            | 0.4                       |
| L-Glutamine           | 1.1                       |
| <b>Total</b>          | <b>47.5</b>               |
